# Supplementary material
Source: Royal Society of Chemistry journal article supplement (doi:10.1039/d6mh00282j)
Supplement: d6mh00282j1.pdf [file d6mh00282j1.pdf]

## Supplementary Information

### Synergistic LSPR and interfacial built-in electric field in Au/WO<sub>3</sub> film for High-performance Flexible Electrochromic Smart Window

Yue Shen,<sup>ab</sup> Ying Lv,<sup>\*a</sup> Pan Li,<sup>\*c</sup> Shengze Li,<sup>ab</sup> Wentian Zhang,<sup>ab</sup> Xin You,<sup>ab</sup> Hangyu Ma,<sup>ab</sup>  
Guojiao Chen,<sup>ab</sup> Tienan Wang,<sup>a</sup> Xiaoyang Guo,<sup>a</sup> Xingyuan Liu<sup>\*a</sup>

<sup>a</sup> State key laboratory of luminescence science and technology, Changchun Institute of Optics, Fine Mechanics and Physics, Chinese Academy of Sciences, Changchun 130033, China.

E-mail: lvying@ciomp.ac.cn; liuxy@ciomp.ac.cn

<sup>b</sup> University of Chinese Academy of Sciences, Beijing 100049, China

<sup>c</sup> The Institute of Advanced Displays and Imaging, Henan Academy of Sciences, Zhengzhou, 450047, China.

E-mail: lipan@hnas.ac.cn

#### **This file includes:**

Supplementary Figures S1-S24

Supplementary Tables S1

Supplementary References

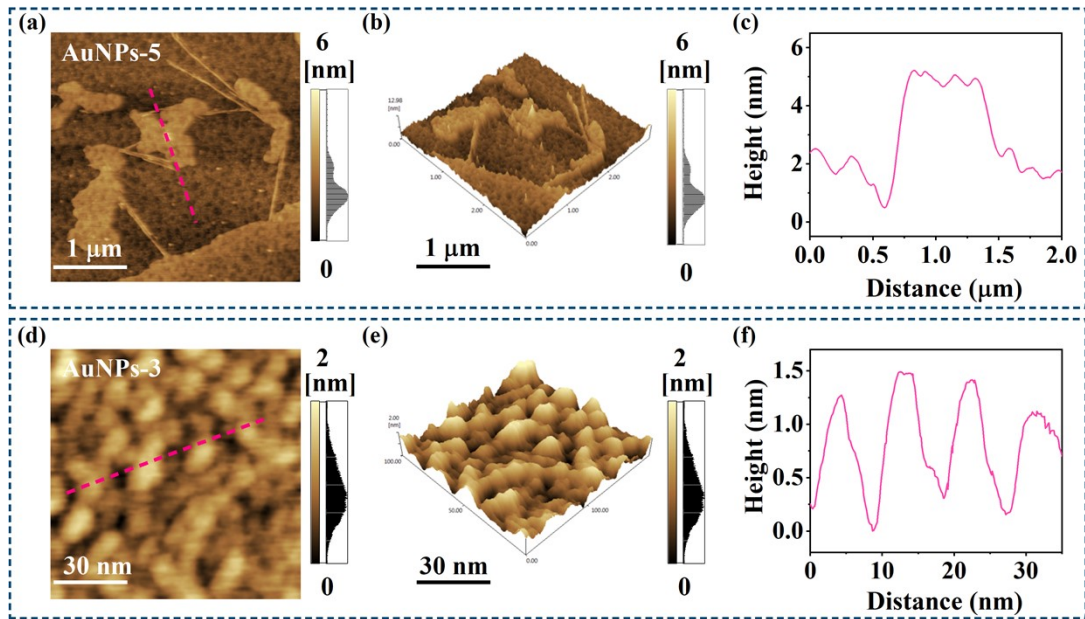

**Fig. S1** (a,d) AFM images , (b,e) 3D AFM images and (c,f) corresponding height line-scan profiles of AuNPs-5 and AuNPs-3.

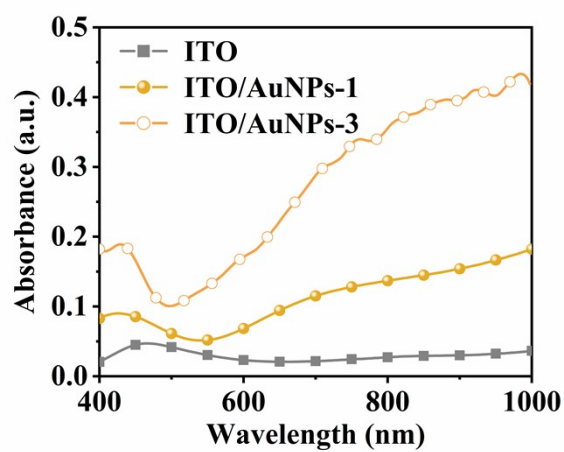

**Fig. S2** Absorbance curve of Bare ITO, ITO/AuNPs-1 and ITO/AuNPs-3.

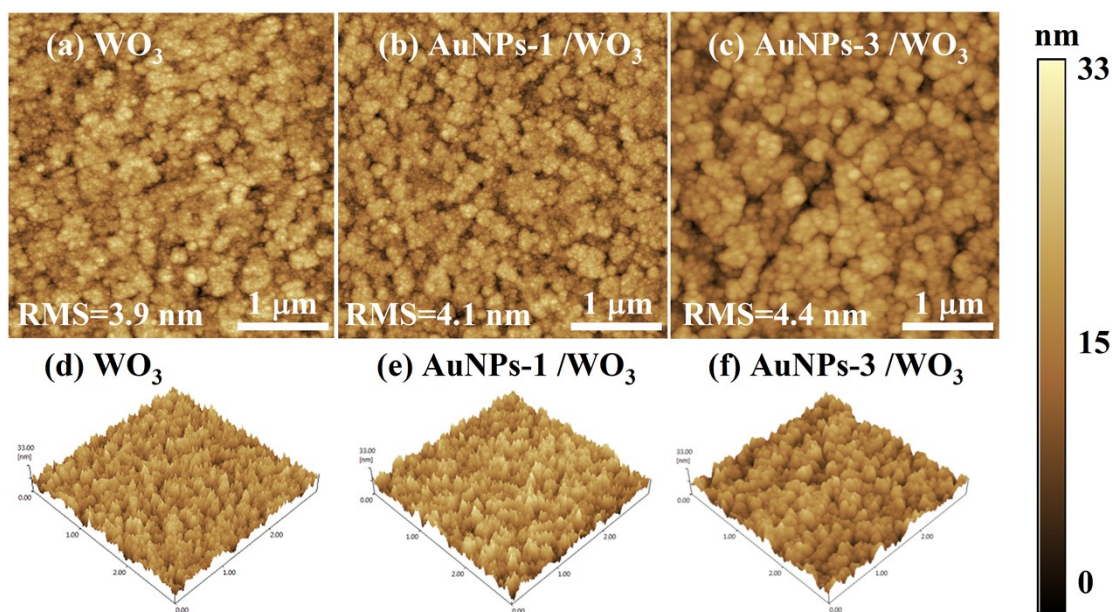

**Fig. S3** The surface and 3D AFM images of (a, d) pure  $\text{WO}_3$ , (b, e) AuNPs-1 / $\text{WO}_3$ , (c, f) AuNPs-3 / $\text{WO}_3$  films, respectively.

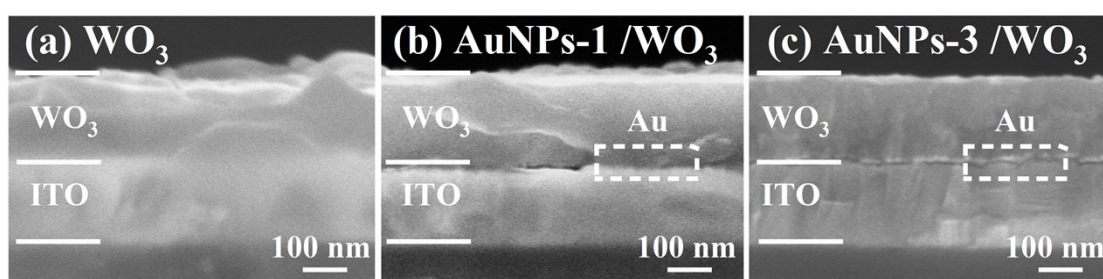

**Fig. S4** Cross-section SEM images of (a) pure  $\text{WO}_3$ , (b) AuNPs-1 / $\text{WO}_3$ , (c) AuNPs-3 / $\text{WO}_3$  films.

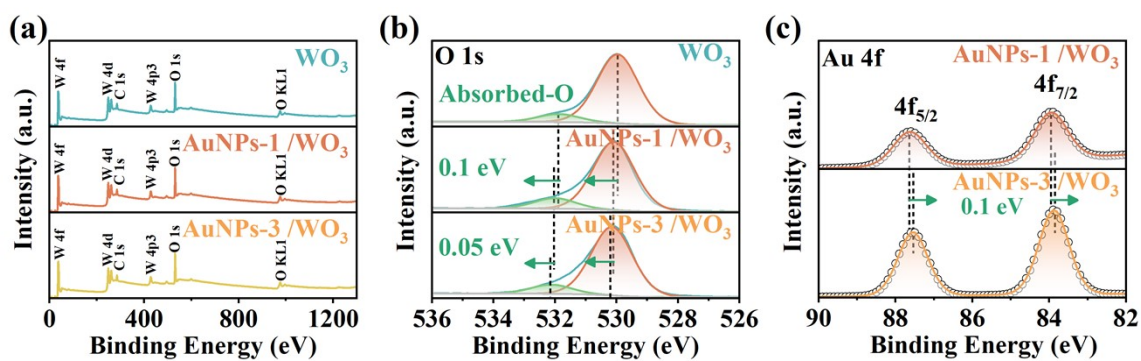

**Fig. S5** (a) Full XPS profiles of pure  $\text{WO}_3$ , AuNPs-1/ $\text{WO}_3$ , and AuNPs-3/ $\text{WO}_3$  with the  $\text{WO}_3$  thickness of 150 nm. High-resolution XPS spectra of (b) O 1s in pure  $\text{WO}_3$ , AuNPs-1/ $\text{WO}_3$ , and AuNPs-3/ $\text{WO}_3$  films with the  $\text{WO}_3$  thickness of 10 nm and (c) Au 4f in AuNPs-1/ $\text{WO}_3$  and AuNPs-3/ $\text{WO}_3$  films.

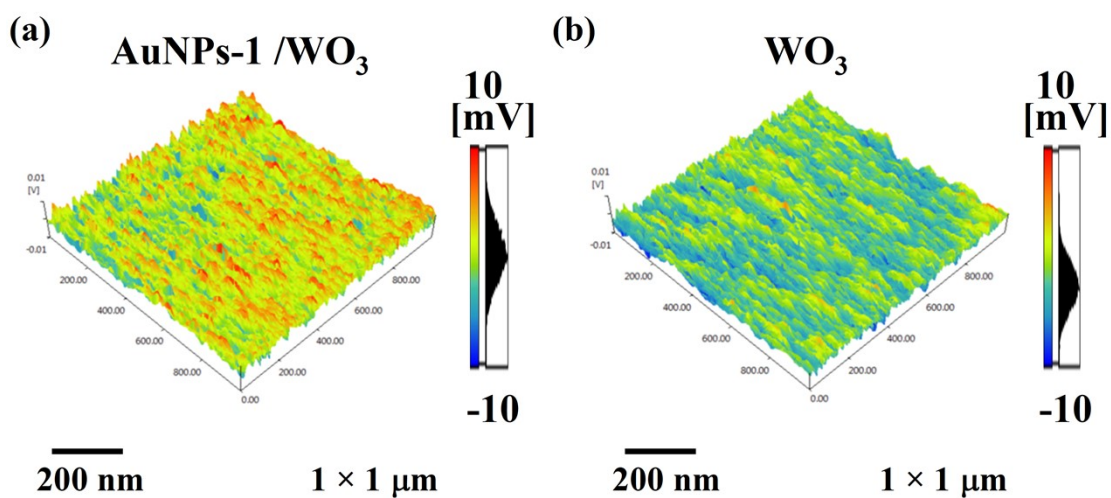

**Fig. S6** 3D KPFM images of (a) AuNPs-1/ $\text{WO}_3$  and (b) pure  $\text{WO}_3$ .

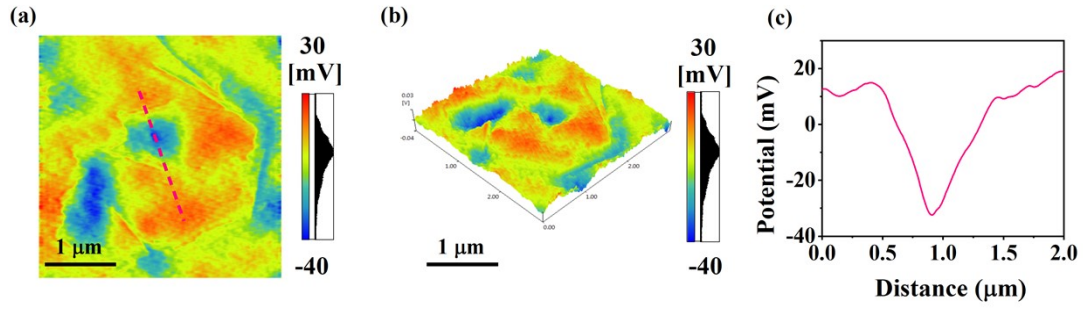

**Fig. S7** (a) AFM images, (b) 3D AFM images and (c) corresponding height line-scan profiles, (d) KPFM images, (e) 3D KPFM images and (f) corresponding surface potential line-scan profiles of quasi-2D Au clusters/ $\text{WO}_3$  film.

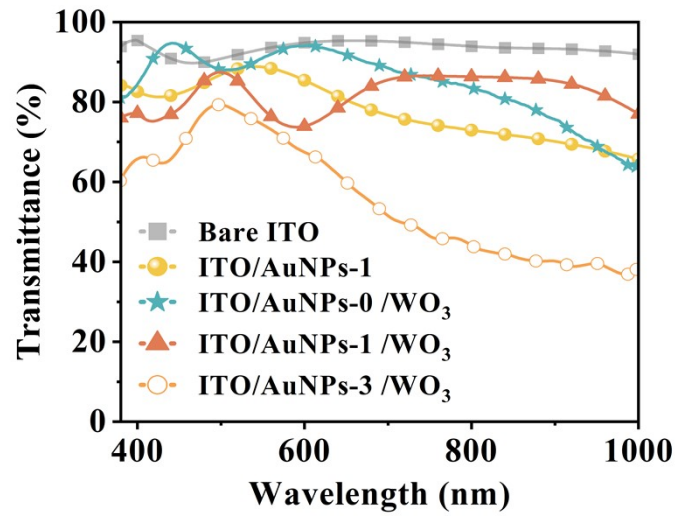

**Fig. S8** The transmittance spectra of bare ITO, ITO/AuNPs-1, ITO/AuNPs-0 / $\text{WO}_3$ , ITO/AuNPs-1 / $\text{WO}_3$  and ITO/AuNPs-3 / $\text{WO}_3$  films with air as the background.

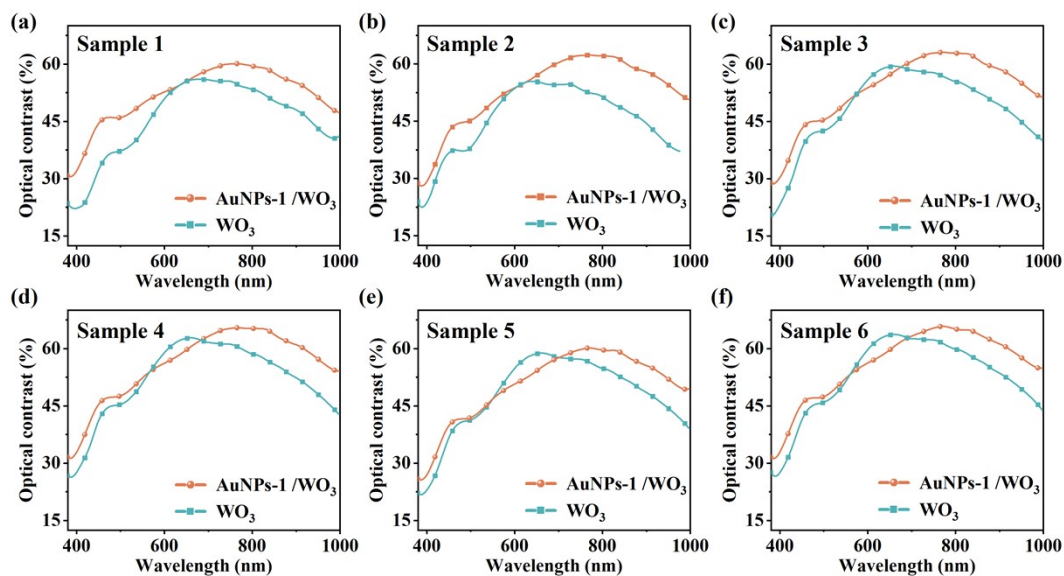

**Fig. S9** Optical contrast at various wavelength of six AuNPs-1 /WO<sub>3</sub> films and pure WO<sub>3</sub> films.

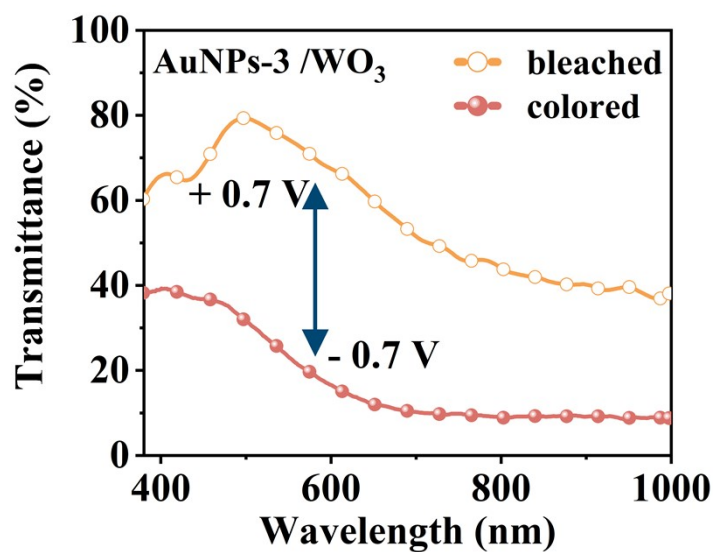

**Fig. S10** Transmittance spectra of AuNPs-3 /WO<sub>3</sub> in the colored and bleached states under the potential of  $\pm 0.7$  V (vs. Ag/AgCl).

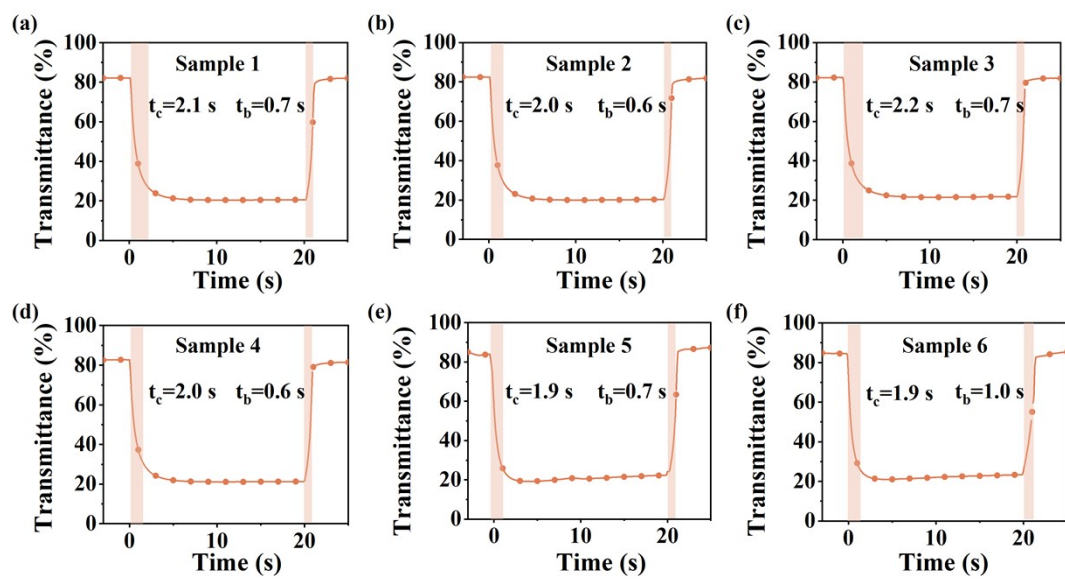

**Fig. S11** In situ transmittance vs. time curves at 700 nm of six AuNPs-1 /WO<sub>3</sub> films.

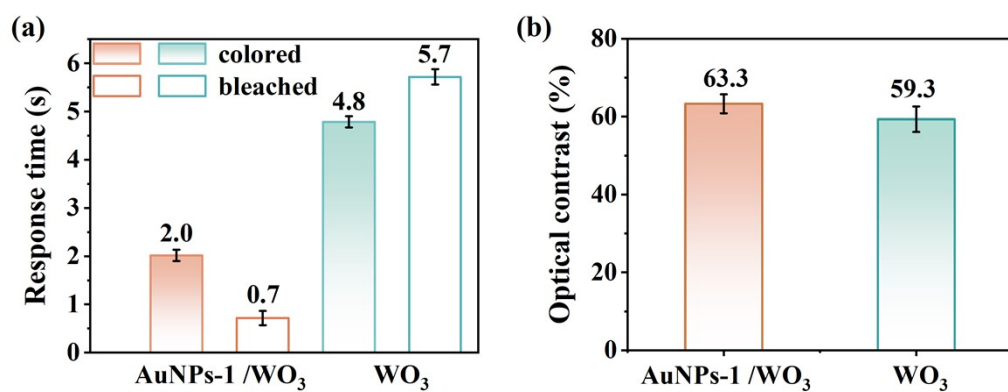

**Fig. S12** Statistical diagram of response time and optical contrast of AuNPs-1 /WO<sub>3</sub> and pure WO<sub>3</sub> films.

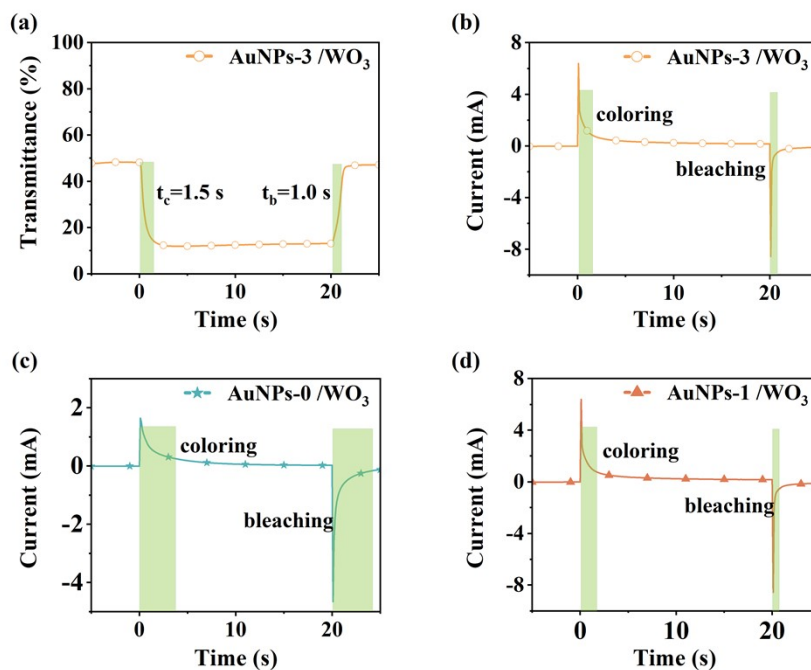

**Fig. S13** (a) Transmittance vs. time curves of AuNPs-3 /WO<sub>3</sub> and current vs. time curves of (b) AuNPs-3 /WO<sub>3</sub>, (c) WO<sub>3</sub>, and (d) AuNPs-1 /WO<sub>3</sub> under potential of  $\pm 0.7$  V (vs. Ag/AgCl) with 20 s intervals.

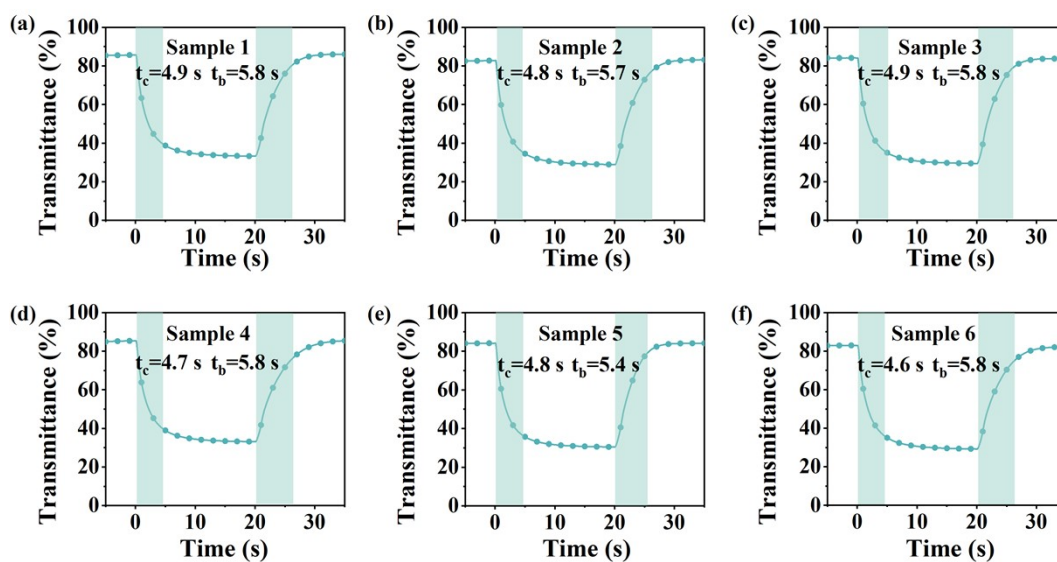

**Fig. S14** In situ transmittance vs. time curves at 700 nm of six pure WO<sub>3</sub> films.

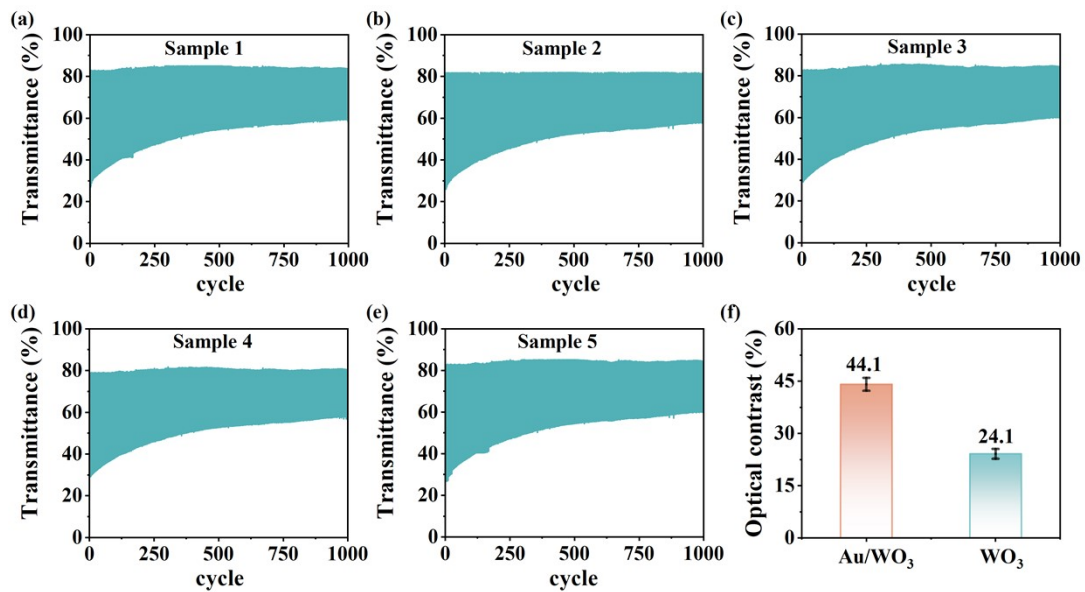

**Fig. S15** In situ transmittance curves for 1000 EC cycles of 5 pure  $\text{WO}_3$  films.

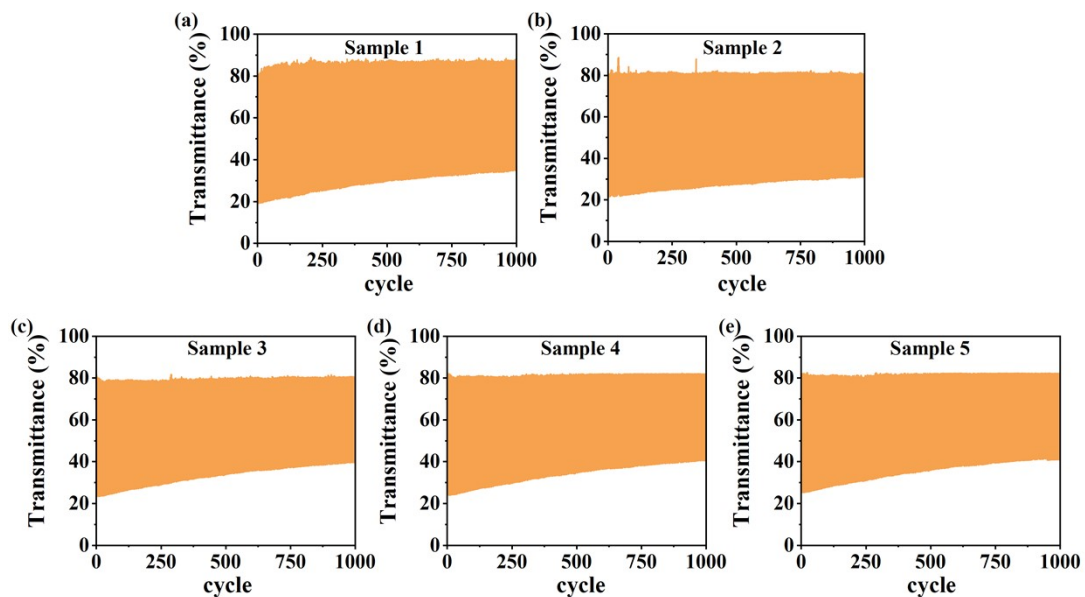

**Fig. S16** In situ transmittance curves for 1000 EC cycles of 5  $\text{AuNPs-1}/\text{WO}_3$  films.

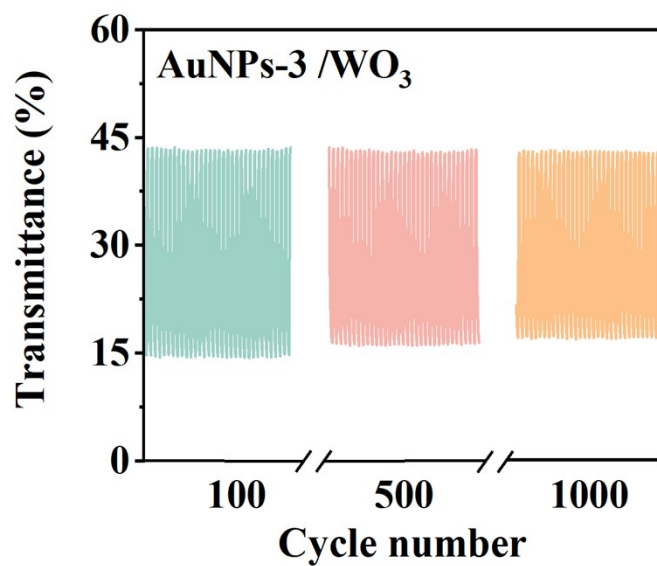

Fig. S17 *In situ* transmittance curves of AuNPs-3 /WO<sub>3</sub> film for 1000 EC cycles .

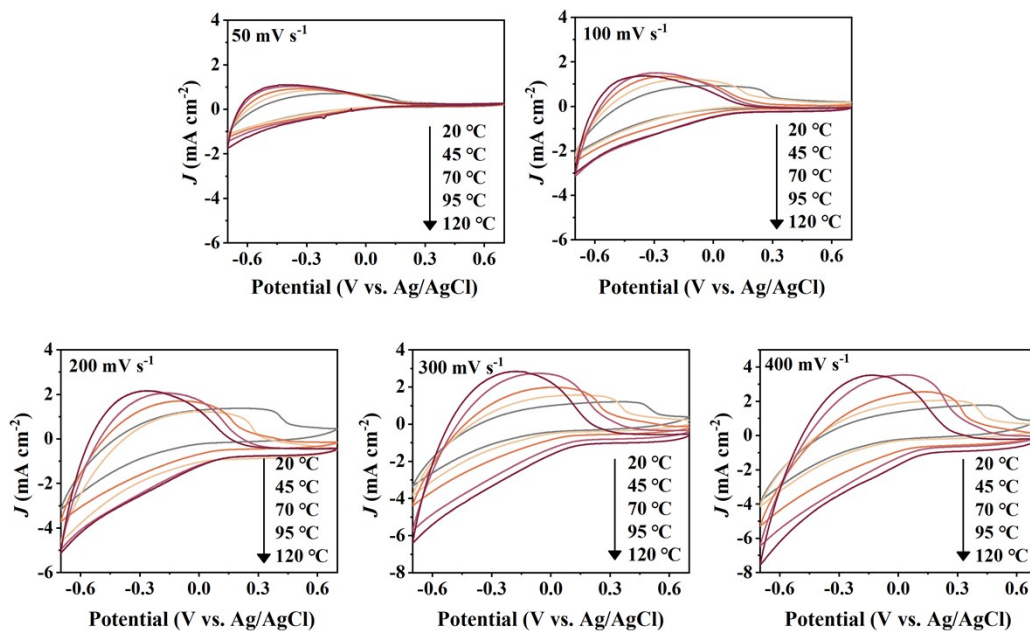

Fig. S18 CV curves of AuNPs-1 /WO<sub>3</sub> film at different temperatures.

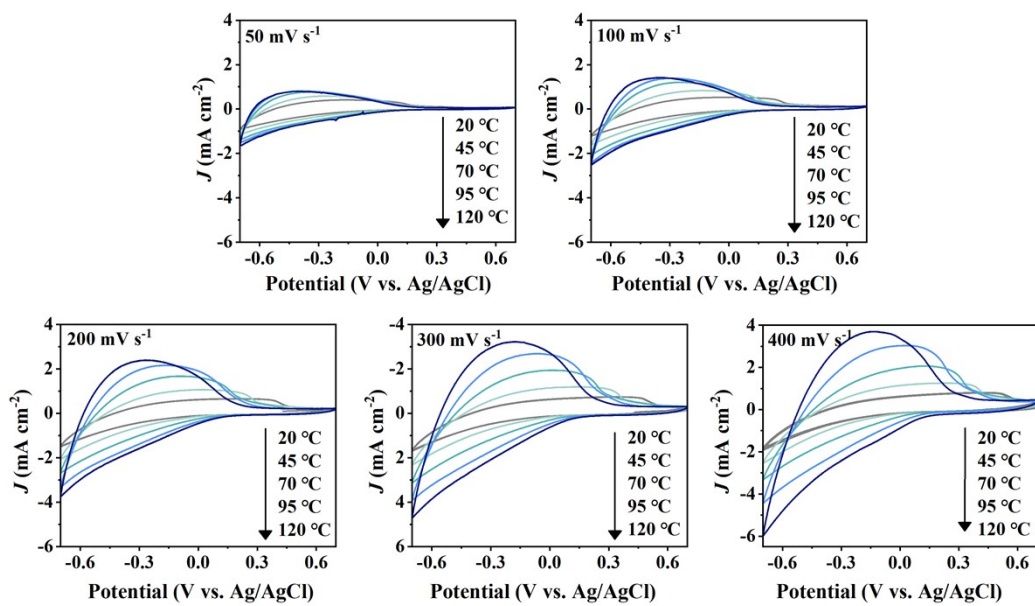

**Fig. S19** CV curves of pure  $\text{WO}_3$  film at different temperatures.

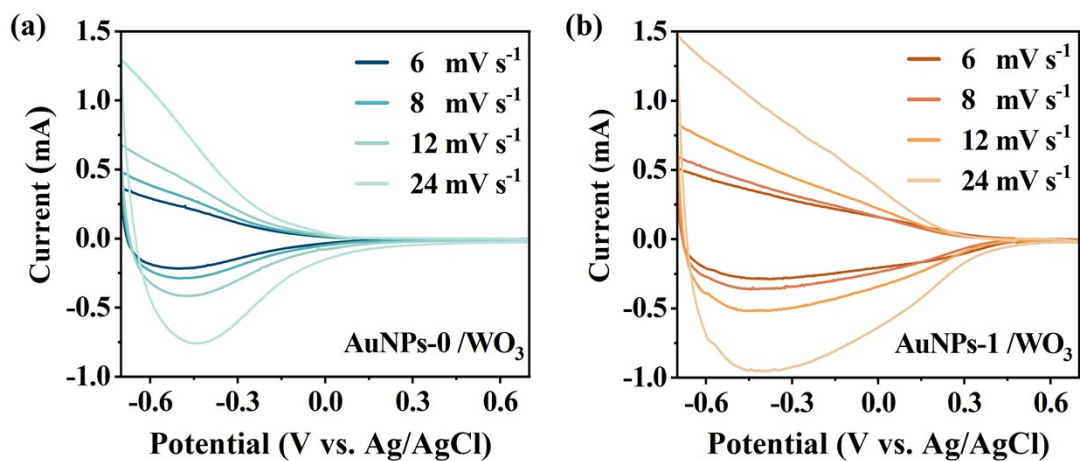

**Fig. S20** CV curves for (a)  $\text{AuNPs-1 /WO}_3$  and (b)  $\text{WO}_3$  at the scan rate of 6, 8, 12, 24  $\text{mV s}^{-1}$ , respectively.

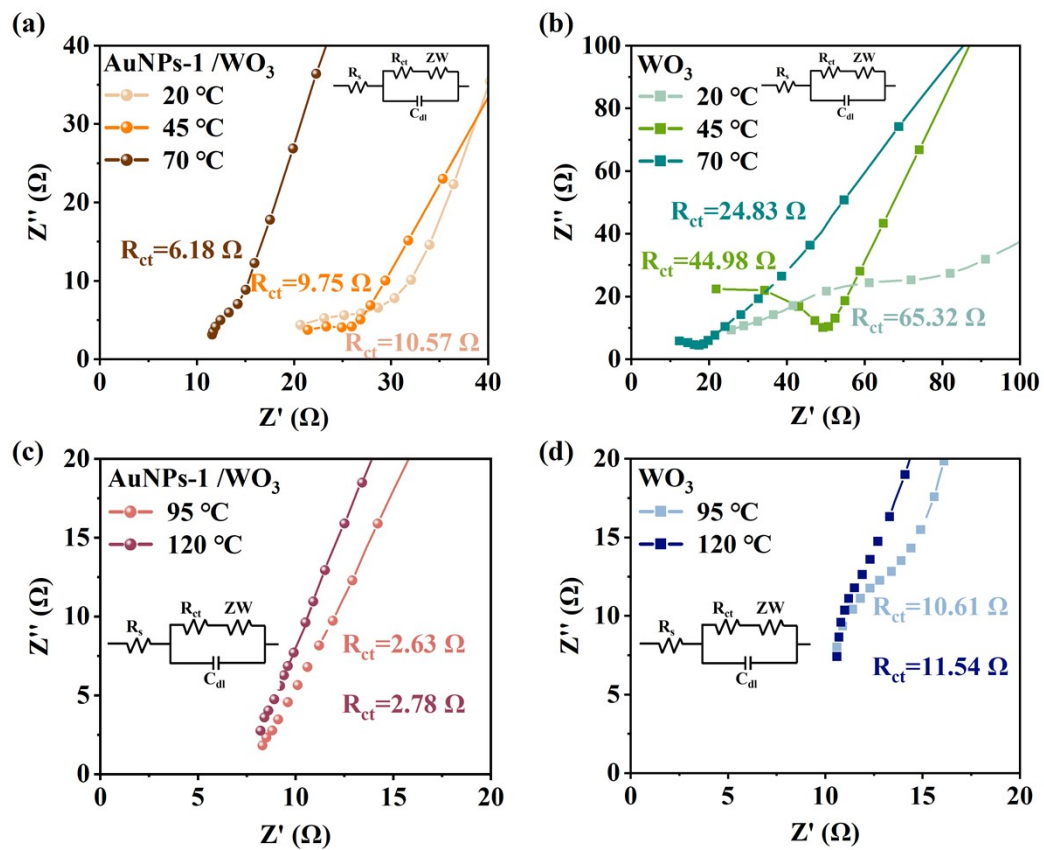

Fig. S21 Nyquist Plots at temperatures (20-120 °C) of AuNPs-1 /WO<sub>3</sub> and pure WO<sub>3</sub> films.

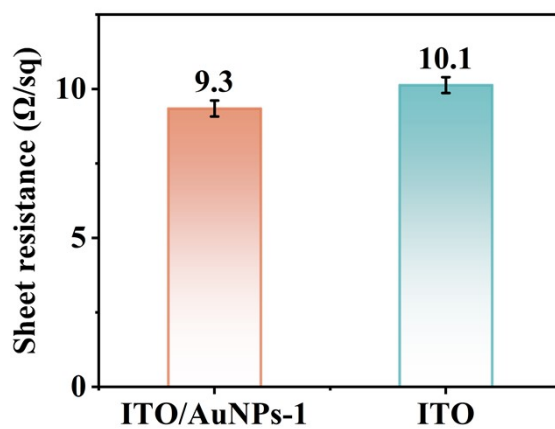

Fig. S22 Statistical diagram of sheet resistance of ITO/AuNPs-1 and ITO films.

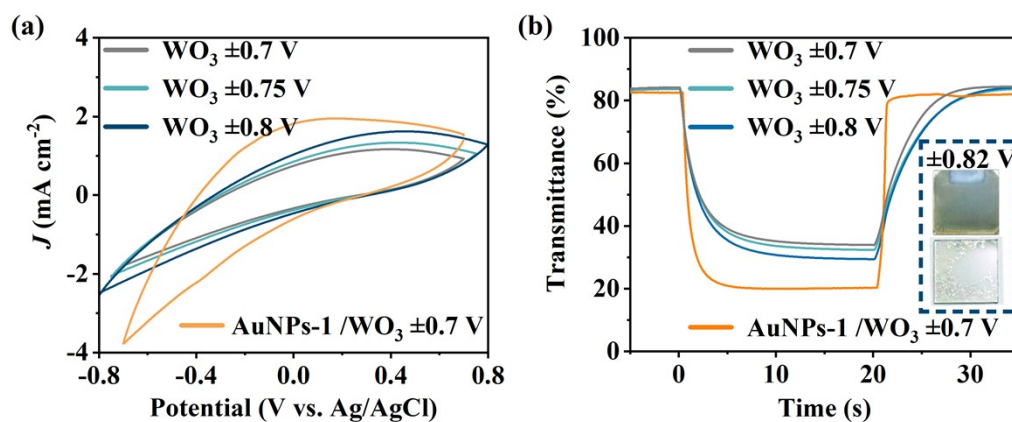

**Fig. S23** CV curves of  $\text{WO}_3$  film at different potentials and AuNPs-1 / $\text{WO}_3$  film at  $\pm 0.7$  V. (b) In situ transmittance vs. time curves at 700 nm with different potentials of  $\text{WO}_3$  and AuNPs-1 / $\text{WO}_3$  films. The insets are photographs after applying  $\pm 0.82$  V, the  $\text{WO}_3$  film are damaged under this condition.

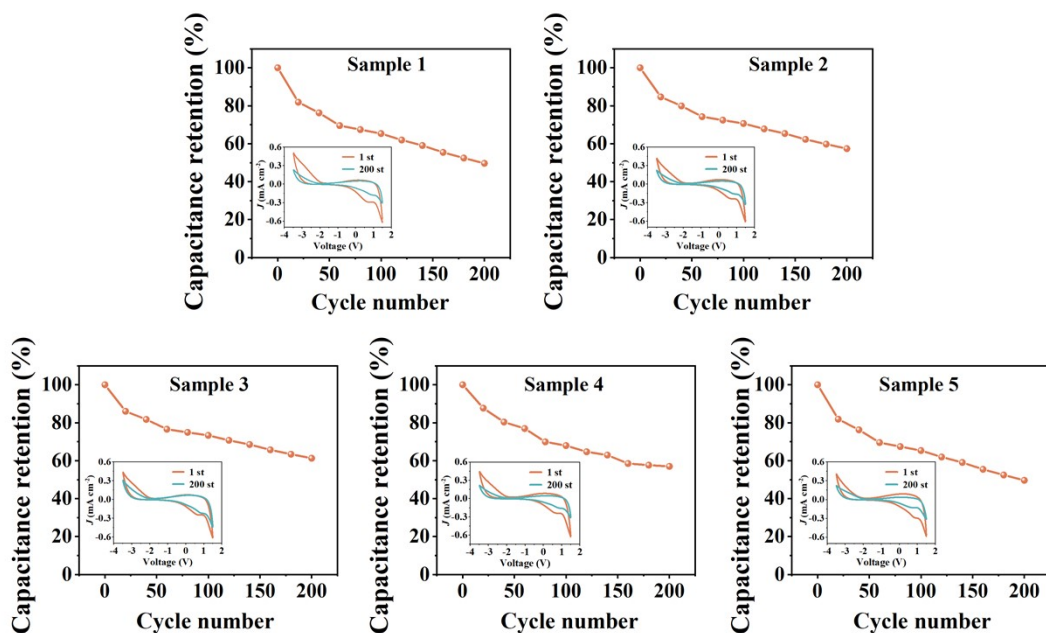

**Fig. S24** Curves of capacitance retention rate of AuNPs/ $\text{WO}_3$  versus cycle number, with the inset showing CV curves during the cycling process.

**Table S1** Performance comparison of noble metal-based electrochromic films.

| EC films                                                        | $t_b/t_c$ (s) | $\Delta T@$<br>wavelength<br>(nm) | CE<br>( $\text{cm}^2 \text{C}^{-1}$ ) | Preparation<br>Method                                     | Flexibility | Thickness<br>(nm) | Film size (cm) | Ref. |
|-----------------------------------------------------------------|---------------|-----------------------------------|---------------------------------------|-----------------------------------------------------------|-------------|-------------------|----------------|------|
| NiO nanocrystals                                                | 2.91/1.77     | 41.5 %/550                        | 114.7                                 | spin-coating<br>(dry:200°C)                               | no          | --                | 3×2            | S1   |
| WO <sub>3</sub> nanotrees                                       | 2.64/7.28     | 74.7 %/630                        | 75.35                                 | two-step<br>solvothermal<br>(heating:180°C)               | no          | 465               | 2×2.5          | S2   |
| Wedge-like WO <sub>3</sub>                                      | 5.0/3.4       | 25 %/550                          | 35.5                                  | dip-coating<br>(180°C)                                    | no          | 350               | 1×1            | S3   |
| WO <sub>3</sub> core/shell<br>nanorod                           | 15/21         | 67.7 %/800                        | 101                                   | spin coating<br>(annealing:250°C)                         | no          | 300               | 1×5            | S4   |
| C-WO <sub>3</sub> /Cu                                           | 3.2/4.5       | 55.35 %/600                       | 102.3                                 | hydrothermal<br>(annealing:550°C)                         | no          | 600               | 1×1            | S5   |
| FTO/Au (20 nm)/TiO <sub>2</sub>                                 | 6.1/8.1       | 40 %/700                          | 24                                    | co-axial<br>electrospinning<br>(annealing:550°C)          | no          | 400               | 1×1            | S6   |
| FTO/WO <sub>3</sub> -AuPRs<br>(NPs: 60 nm<br>nanorods:20×80 nm) | 3.0/4.4       | 70 %/630                          | 88                                    | seed-growth and<br>electrodeposition<br>(annealing:350°C) | no          | 850               | 1.5×3          | S7   |

|                                                    |                |                 |                               |                                                        |            |            |                |                 |
|----------------------------------------------------|----------------|-----------------|-------------------------------|--------------------------------------------------------|------------|------------|----------------|-----------------|
| CoS <sub>2</sub> /WO <sub>3</sub>                  | 3.7/4.1        | 73.31 %/700     | 64.5                          | spin-coating<br>drop-casting<br>(annealing:60°C)       | no         | 600        | 2.5×2.5        | S8              |
| WO <sub>3</sub> -Ag (13 nm)                        | 4.4/5.3        | 39.65 %/632.8   | 74.2                          | physical vapor<br>deposition<br>(annealing:375°C)      | no         | 344        | 2×0.9          | S9              |
| WO <sub>3</sub> nanofilm                           | 12.4/10.7      | 69.7 %/700      | 72.5                          | hydrothermal<br>(sealing:120°C)                        | no         | 755        | 1×4.8          | S10             |
| WO <sub>3</sub> quantum-dot                        | 7.5/4.0        | 77.4 %/580      | 101.7                         | solvothermal<br>(heating:180°C)                        | no         | 200        | --             | S11             |
| WO <sub>3</sub>                                    | 11.5/7.0       | 83 %/633        | 68.3                          | spin-coating<br>(annealing:300°C)                      | no         | 346        | 3×3            | S12             |
| Nb-doped WO <sub>3</sub>                           | 15/3           | 54.9 %/630      | 61.1                          | sputter deposition                                     | no         | 141        | --             | S13             |
| WO <sub>3</sub> @Nd-Co <sub>3</sub> O <sub>4</sub> | 12.3/6.9       | 79.3 %/600      | 107.3                         | electrodeposition<br>(annealing:450°C)                 | no         | 285        | 1×2.5          | S14             |
| WO <sub>3</sub>                                    | 4.5/3.5        | 66.1 %/633      | 40.5                          | hydrothermal<br>(annealing:300°C)                      | no         | 510        | 1.5×3          | S15             |
| <b>ITO/AuNPs-1 /WO<sub>3</sub></b>                 | <b>2.0/0.7</b> | <b>60 %/700</b> | <b>187</b><br><b>(BE=680)</b> | <b>E-beam Evaporation</b><br><b>(room temperature)</b> | <b>yes</b> | <b>150</b> | <b>1.8×1.8</b> | <b>Our work</b> |

---

## Reference

- S1. Z. Q. Xie, X. Li, Y. Zhang et al., *Mater. Today Commun.*, 2019, **21**, 100635.
- S2. Y. Li, W. A. McMaster, H. Wei et al., *ACS Appl. Energy Mater.*, 2018, **1**, 2552-2558.
- S3. S. Adhikari, R. Swain, D. Sarkar and G. Madras, *Mol. Catal.*, 2017, **432**, 76-87.
- S4. X. T. Huo, Y. Li, H. Wei et al., *J. Mater. Chem. A*, 2019, **7**, 16867-16875.
- S5. L. Zhao, S. S. Nie, H. X. Han et al., *Appl. Surf. Sci.*, 2025, **713**, 164311.
- S6. C. Eyovge, S. Kaya, M. O. Guler et al., *ACS Appl. Nano Mater.*, 2021, **4**, 8600-8610.
- S7. J. W. Xu, Y. Zhang, L. Wang et al., *ACS Nano*, 2018, **12**, 6895-6903.
- S8. K. Ahmad, M. A. Shinde, G. Song et al., *Ceram. Int.*, 2023, **49**, 10119-10129.
- S9. S. Hoseinzadeh, R. Ghasemiasl, A. Bahari et al., *J. Mater. Sci.: Mater. Electron.*, 2017, **28**, 14855-14863.
- S10. Y. X. Wang, I. M. Zeng, Z. H. Zhou et al., *Appl. Surf. Sci.*, 2022, **573**, 151603.
- S11. D. Yang, S. Deng, Z. Jin et al., *Commun. Mater.*, 2026, **7**, 106.
- S12. J. S. Fang, Y. Gong, L. K. Wang et al., *Opt. Mater.*, 2026, **174**, 117902.
- S13. A. K. Mak, D. Uysal et al., *J. Alloys Compd.*, 2025, **1031**, 181040.
- S14. P. J. Morankar, R. U. Amate et al., *Chem. Eng. J.*, 2025, **524**, 169630.
- S15. J. Wu, L. Zhao et al., *Ceram. Int.*, 2025, **51**, 35202-35213.
